# Supplementary material for: Acute Leukoencephalopathy with Restricted Diffusion Following Dehydration in Infant: A case report
Source: Research Square preprint supplement (doi:10.21203/rs.3.rs-6912007/v1), 2025-07-23
Supplement: Supplementary file 1 [file 165f9cc30f38a255996ad913.docx]

CARE Checklist – Case Report: ALERD Following Dehydration in an Infant

| Item No. | Section | Checklist Item Description | Reported on Page | Line Numbers |
| --- | --- | --- | --- | --- |
| 1 | Title | Diagnosis or intervention followed by “case report” | Page 1 | Lines 1–2 |
| 2 | Keywords | 2–5 keywords including “case report” | Page 2 | Lines 36-38 |
| 3a | Abstract – Introduction | What is unique about this case, what it adds to literature | Pages 1, 2 | Lines 5–13 |
| 3b | Abstract – Findings | Main symptoms and/or important clinical findings | Page 2 | Lines 14–25 |
| 3c | Abstract – Diagnosis etc. | Main diagnoses, therapeutic interventions, outcomes | Page 2 | Lines 14–26 |
| 3d | Abstract – Conclusion | Main “takeaway” lesson | Page 2 | Lines 27-34 |
| 4 | Introduction | Why this case is unique (with references) | Page 2 | Lines 42–49 |
| 5a | Patient Information | De-identified patient information | Page 3 | Line 51 |
| 5b | Primary Concerns & Symptoms | Primary complaints and symptoms | Page 3 | Lines 51–63 |
| 5c | History | Medical, family, psycho-social history | Not reported | Not reported |
| 5d | Past Interventions | Relevant past interventions and outcomes | Not reported | Not reported |
| 6 | Clinical Findings | Physical examination and clinical findings | Page 3 | Lines 53, 54, 56-58 |
| 7 | Timeline | Timeline of care organized chronologically | Page 5 | Lines 82-85 |
| 8a | Diagnostic Testing | Diagnostic tests (PE, lab, imaging, CSF, etc.) | Pages 3, 4 | Lines 59, 64-80 |
| 8b | Diagnostic Challenges | Access or interpretation barriers | Page 3 | Lines 59 |
| 8c | Diagnosis | Final diagnosis and differentials | Pages 3,4,6 | Lines 69-70,105-116 |
| 8d | Prognosis | Prognosis or staging (if applicable) | Page 5 | Lines 95-98 |
| 9a | Therapeutic Intervention | Type (e.g. supportive, pharmacological) | Page 3 | Lines 54-55 |
| 9b | Intervention Details | Dose, duration, route, etc. | Page 3 | Lines 60-63 |
| 9c | Changes in Therapy | Change in treatment and reasons | Not reported | Not reported |
| 10a | Outcomes | Clinician and patient-assessed outcomes | Page 6 | Lines 102-104 |
| 10b | Follow-up Results | Follow-up diagnostics or testing | Page 6 | Lines 103-104 |
| 10c | Adherence | Intervention adherence and how it was assessed | Not reported | Not reported |
| 10d | Adverse Events | Adverse or unexpected outcomes | Not reported | Not reported |
| 11a | Discussion – Strengths/Limits | Strengths and limitations of the case | Page 6 | Lines 117-120 |
| 11b | Discussion – Literature | Relevant medical literature with references | Page 5 | Lines 90-98 |
| 11c | Discussion – Reasoning | Scientific rationale, causal assessment | Page 6 | Lines 99-102 |
| 11d | Conclusion | Final paragraph with takeaway messages | Page 7 | Lines 121-125 |
| 12 | Patient Perspective | Patient’s (or family’s) perspective | Not Reported | Not reported |
| 13 | Informed Consent | Statement about patient consent | Page 7 | Lines 141-145 |
